# Supplementary material for: Toward Increasing Engagement in Substance Use Data Collection: Development of the Substance Abuse Research Assistant App and Protocol for a Microrandomized Trial Using Adolescents and Emerging Adults
Source: PubMed Central journal article supplement (PMC6070723; doi:10.2196/resprot.9850), 2018-07-18
Supplement: resprot_v7i7e166_app1.pdf [file resprot_v7i7e166_app1.pdf]

# Daily survey

These questions are about how you're feeling today.

1. How stressed are you today?

0                      1                      2                      3                      4  
Not at all                      Somewhat                      A lot

2.

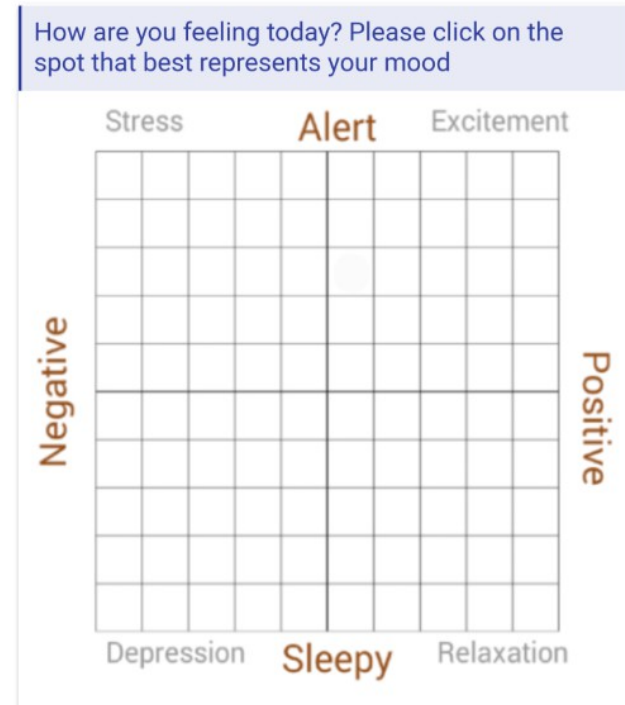

3. How much free time have you had today?

- Less than 1 hour
- Between 1 and 2 hours
- Between 2 and 3 hours
- Between 3 and 4 hours
- Between 4 and 5 hours
- Between 5 and 6 hours
- Between 6 and 7 hours
- Between 7 and 8 hours
- Between 8 and 9 hours
- Between 9 and 10 hours
- Between 10 and 11 hours
- Between 11 and 12 hours
- Between 12 and 13 hours
- Between 13 and 14 hours
- Between 14 and 15 hours

Between 15 and 16 hours  
16 or more hours

4. How much fun have you had today?

0                      1                      2                      3                      4  
Not at all                      Some                      A lot

5. How lonely or left out have you felt today?

0                      1                      2                      3                      4  
Not at all                      Somewhat                      Very

6. How new and exciting has your day been?

0                      1                      2                      3                      4  
Not at all                      Somewhat                      Very

7. Do you expect good things will happen to you tomorrow?

0                      1                      2                      3                      4  
Not at all                      Somewhat                      Very Much

## Active tasks

Tapping task

The image displays three sequential screenshots of a mobile application interface for a 'Tapping Speed' task.

- Step 1 of 3:** The screen shows a blue header with a back arrow and 'Tapping task'. Below it, 'Step 1 of 3' is indicated. The main title is 'Tapping Speed' with the subtitle 'This task measures your tapping speed'. An illustration of a smartphone shows two 'Tap' buttons on the screen. A blue 'Next' button is at the bottom.
- Step 2 of 3:** The screen shows a blue header with a back arrow and 'Tapping task'. Below it, 'Step 2 of 3' is indicated. The main title is 'Tapping Speed' with the subtitle 'Rest your phone on a flat surface. Two buttons will appear on the screen for 10 seconds. Using two fingers on the same hand, take turns tapping the buttons as quickly as you can'. Below the text is an illustration of a hand with two fingers tapping. A blue 'Get started' button is at the bottom.
- Tap count:** The screen shows a blue header with a back arrow and 'Tapping task'. Below it, the instruction 'Tap the buttons as quickly as you can using two fingers' is shown. A '1 seconds left' timer is displayed. Below the timer, the 'Tap count' is shown as '5' with a small crab icon. At the bottom, two red circular buttons labeled 'Tap' are visible.

## Spatial task

< Spatial task

Step 1 of 3

### Spatial Memory

This activity measures your short-term spatial memory by asking you to repeat the order in which the shells light up.



< Spatial task

Step 2 of 3

### Spatial Memory

Some of the shells will light up one at a time. Tap those shells in the same order they light up.

Tap **get started** to begin



< Spatial task

### Watch the shells light up



Next

Get started

## Weekly survey

This past week, did you...

1. Do or say things without thinking?
  - Rarely/Never
  - Occasionally
  - Often
  - Almost Always/Always
2. Plan tasks carefully?
  - Rarely/Never
  - Occasionally
  - Often
  - Almost Always/Always
3. Concentrate easily?
  - Rarely/Never
  - Occasionally
  - Often
  - Almost Always/Always

4. How frequently have you smoked cigarettes this week?

- Not at all
- Less than one cigarette per day
- 1-5 cigarettes per day
- About ½ pack per day
- About 1 pack per day
- About 1 ½ packs per day
- Two packs or more per day

5. Electronic vaporizers make a mist that is inhaled and have the feel of cigarette smoking. Examples include e-cigarettes and e-pens. How many days this week did you use an electronic vaporizer, such as an e-cigarette, to inhale a *nicotine* mist?

- 0
- 1
- 2
- 3
- 4
- 5
- 6 or more days

6. This week, how many drinks did you have on...

- Sunday?
- Monday?
- Tuesday?
- Wednesday?
- Thursday?
- Friday?
- Saturday?

*Response options for each day should be:*

- 0
- 1
- 2
- 3
- 4
- 5
- 6
- 7
- 8
- 9
- 10
- 11
- 12
- 13
- 14
- 15
- 16
- 17
- 18
- 19
- 20+

*If participant reports 1+ drinks in the past week ☐ show Q7a*

*If participant reports 0 drinks in the past week ☐ show Q7b*

7a. Pick the top reason(s) why you drank this week:

To enjoy the feeling

To avoid feeling left out

To feel less depressed, anxious or angry

To make social gatherings more fun

Other (please specify: \_\_\_\_\_)

7b. Pick the top reason(s) why you didn't drink this week:

Didn't want to

No chance/time

Out of alcohol

Trying to cut back

More important things to do

Cost

Other (please specify: \_\_\_\_\_)

*[Each week, participants will receive one question from the group of questions numbered 8a, 8b, 8c, 8d or 8e]*

8a. What do you dislike, for no good reason?

Mayonnaise

Dryer lint

People who brag on Facebook

The word "moist"

Name brand addicts

Country music

Reality TV

None, I like all of these things

8b. If you were stranded on a desert island, what one food, what would you bring?

Ramen noodles

Cookie dough ice cream

Nacho cheese Dorito's

Power bars

Pop Rocks

French fries

Forget food, I'm bringing coffee

Gross. Who would take this stuff to a desert island?

8c. What movie best describes your life?

Breakfast Club

A Nightmare on Elm Street

Love Actually

Clueless

Kickass

Diary of a Wimpy Kid

Barely Legal

None of these; my life deserves its own movie

8d. If you were an animal, what would you be?

- Dinosaur
- Alligator
- Unicorn
- Cockroach
- Wallaby
- Dragon
- Charizard

I'm way cooler than any of these animals

8e. If you could hang out with a movie character for one day, who would you pick?

- Harry Potter
- Ironman
- Jack Sparrow from Pirates of the Caribbean
- Fat Amy from Pitch Perfect
- Katniss Everdeen from Hunger Games
- Napoleon Dynamite
- Elle Woods from Legally Blonde

Um, none of them. These characters are lame

9. This week, how much marijuana did you use on...

- Sunday?
- Monday?
- Tuesday?
- Wednesday?
- Thursday?
- Friday?
- Saturday?

*Response options for each day should be:*

- 0g
- 0.25g (1/2 joint)
- 0.5g (1 joint)
- 1g (2 joints)
- 1.5g (3 joints)
- 2g (4 joints)
- 2.5g+ (5+ joints)
- Not sure

*If participant reports any marijuana in the past week  show 10a only*

*If participant reports no marijuana in the past week  show 10b only*

10a. Pick the top reason(s) why you used marijuana this week:

- To enjoy the feeling
- To avoid feeling left out
- To expand your awareness
- To feel less depressed, anxious or angry
- To make social gatherings more fun
- Other (please specify: \_\_\_\_\_)

10b. Pick the top reason(s) why you didn't use marijuana this week:

- Didn't want to
- No chance/time
- Out of weed
- Trying to cut back
- More important things to do
- Cost
- Other (please specify: \_\_\_\_\_)

***These next two questions are about what you think you will do next week.***

11. In the next week, how likely are you to avoid using marijuana if you have the chance?

|            |   |   |   |      |
|------------|---|---|---|------|
| 0          | 1 | 2 | 3 | 4    |
| Not at all |   |   |   | Very |

12. In the next week, how likely are you to avoid drinking alcohol if you have the chance?

|            |   |   |   |      |
|------------|---|---|---|------|
| 0          | 1 | 2 | 3 | 4    |
| Not at all |   |   |   | Very |

***How much do you think people your age risk harming themselves (physically or in other ways) if they...***

13. Use marijuana regularly?

Not at all, Slightly, Moderately, Very, Extremely

14. Drink alcohol regularly?

Not at all, Slightly, Moderately, Very, E
