# Supplementary material for: Toward Increasing Engagement in Substance Use Data Collection: Development of the Substance Abuse Research Assistant App and Protocol for a Microrandomized Trial Using Adolescents and Emerging Adults
Source: PubMed Central journal article supplement (PMC6070723; doi:10.2196/resprot.9850), 2018-07-18
Supplement: resprot_v7i7e166_app2.pdf [file resprot_v7i7e166_app2.pdf]

Daily survey: 30 points  
2 active tasks: 30 points  
Extra: 50 points for Sunday's survey

Fish bowl environment

|                                                                                     |                                       |
|-------------------------------------------------------------------------------------|---------------------------------------|
|    | clown fish<br>Points: 30<br>Day 1     |
|    | Butterfly fish<br>Points: 60<br>Day 1 |
|    | Gold fish<br>Points: 90<br>Day 2      |
|  | Tiger barb<br>Points: 120<br>Day 2    |
|  | Squid<br>Points: 180<br>Day 3         |
| GAP                                                                                 | GAP                                   |
|  | Octopus<br>Day 5:<br>Points 300       |

|                                                                                             |                                                                          |
|---------------------------------------------------------------------------------------------|--------------------------------------------------------------------------|
|            | <p>Angel fish, give 2 angel fish.<br/>Points: 360<br/>Day 6</p>          |
|            | <p>Crab<br/>Points: 470<br/>Day 7</p>                                    |
| <p>GAP</p>                                                                                  | <p>GAP (need 120 points to get next fish)</p>                            |
|  <p>35</p> | <p>Star fish<br/>Points: 590<br/>Day 9</p>                               |
|          | <p>Green fish (60 pts after getting crab)<br/>Points: 650<br/>Day 10</p> |
| <p>GAP</p>                                                                                  | <p>GAP (need 120 points to get next fish)</p>                            |
|          | <p>Electric fish<br/>Points: 770<br/>Day 12</p>                          |
|          | <p>Discus fish<br/>Points: 830<br/>Day 13</p>                            |

|                                                                                   |                                                                                     |
|-----------------------------------------------------------------------------------|-------------------------------------------------------------------------------------|
|  | <p>Red Betta fish<br/>Points: 940, weekly survey<br/>Day 14</p>                     |
|  | <p>Sea horse, give 3 sea horse.<br/>Sea horse, fish<br/>Points: 1000<br/>Day 15</p> |

Level 2: The sea

|                                                                                     |                                                               |
|-------------------------------------------------------------------------------------|---------------------------------------------------------------|
|  | <p>Blue tang fish and clown fish<br/>Points: 60<br/>Day 1</p> |
|  | <p>Jelly fish<br/>Points: 120<br/>Day 2</p>                   |
|  | <p>Sea crabs<br/>Points: 180<br/>Day 3</p>                    |

|                                                                                     |                                                                                                                             |
|-------------------------------------------------------------------------------------|-----------------------------------------------------------------------------------------------------------------------------|
|    | <p>Three anchovies<br/>Points: 240<br/>Day 4</p>                                                                            |
| <p>GAP</p>                                                                          | <p>GAP</p>                                                                                                                  |
|    | <p>Bubbles<br/>Angel fish<br/>Points: 360<br/>Day 6<br/><br/>Points: 470, 2<sup>nd</sup> fish, weekly survey.<br/>Day 7</p> |
|  | <p>Salmon<br/>Points: 530<br/>Day 8</p>                                                                                     |
| <p>GAP</p>                                                                          | <p>GAP</p>                                                                                                                  |
|  | <p>Deep undersea fish<br/>Points: 650<br/>Day 10</p>                                                                        |
|  | <p>Give the sword fish<br/><br/>Points: 710<br/>Day 11</p>                                                                  |
| <p>GAP</p>                                                                          | <p>GAP</p>                                                                                                                  |

|                                                                                     |                                                          |
|-------------------------------------------------------------------------------------|----------------------------------------------------------|
| 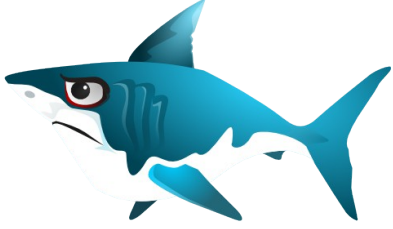   | <p>Shark<br/>Points: 830<br/>Day 13</p>                  |
|    | <p>Dolphin<br/>Points: 940<br/>Day 14, weekly survey</p> |
|    | <p>Whale<br/>Points: 1000<br/>Day 15</p>                 |
|  | <p>Kite fish<br/>Points: 1060<br/>Day 15</p>             |
