# Supplementary material for: Toward Increasing Engagement in Substance Use Data Collection: Development of the Substance Abuse Research Assistant App and Protocol for a Microrandomized Trial Using Adolescents and Emerging Adults
Source: PubMed Central journal article supplement (PMC6070723; doi:10.2196/resprot.9850), 2018-07-18
Supplement: resprot_v7i7e166_app3.pdf [file resprot_v7i7e166_app3.pdf]

### Rewards for daily survey streaks

|                                                                                   |                                                                  |
|-----------------------------------------------------------------------------------|------------------------------------------------------------------|
|  | <b>Ruby stone</b><br>For each 3 day streak<br>of daily surveys   |
|  | <b>Aquamarine</b><br>For each 6 day streak<br>of daily surveys   |
|  | <b>Bloodstone</b><br>For each 12 day streak<br>of daily surveys  |
|  | <b>Agronite</b><br>For each 18 day streak<br>of daily surveys    |
|  | <b>Shell stone</b><br>For each 30 day streak<br>of daily surveys |

### Rewards for active task streaks

|                                                                                     |                                                                               |
|-------------------------------------------------------------------------------------|-------------------------------------------------------------------------------|
|  | <b>Japanese Akaya white pearl</b><br>For each 3 day streak<br>of active tasks |
|  | <b>Pink pearl</b><br>For each 6 day streak<br>of active tasks                 |
|  | <b>Southsea golden pearl</b><br>For each 12 day streak<br>of active tasks     |
|  | <b>Orange pearl</b><br>For each 18 day streak<br>of active tasks              |

|                                                                                   |                                                                           |
|-----------------------------------------------------------------------------------|---------------------------------------------------------------------------|
|  | <b>Taihitian black pearl</b><br>For each 30 day streak<br>of active tasks |
|-----------------------------------------------------------------------------------|---------------------------------------------------------------------------|

Rewards for weekly survey streaks

|                                                                                     |                                                    |
|-------------------------------------------------------------------------------------|----------------------------------------------------|
|    | <b>Sapphire stone</b><br>After first weekly survey |
|    | <b>Jade stone</b><br>After 2nd weekly survey       |
|   | <b>Emerald</b><br>After 3rd weekly survey          |
|  | <b>Red beryl</b><br>After 4th weekly survey        |
