# Supplementary material for: Toward Increasing Engagement in Substance Use Data Collection: Development of the Substance Abuse Research Assistant App and Protocol for a Microrandomized Trial Using Adolescents and Emerging Adults
Source: PubMed Central journal article supplement (PMC6070723; doi:10.2196/resprot.9850), 2018-07-18
Supplement: resprot_v7i7e166_app4.pdf [file resprot_v7i7e166_app4.pdf]

# Life insights

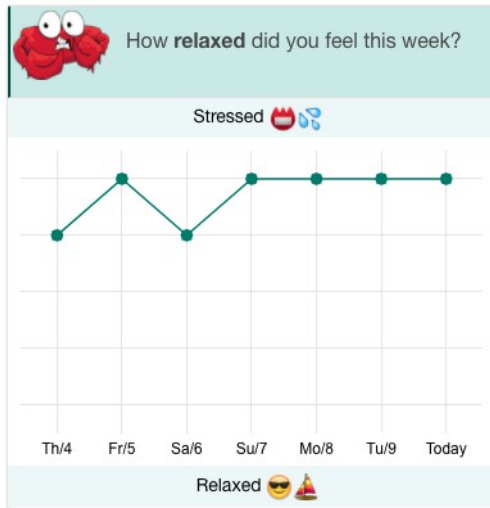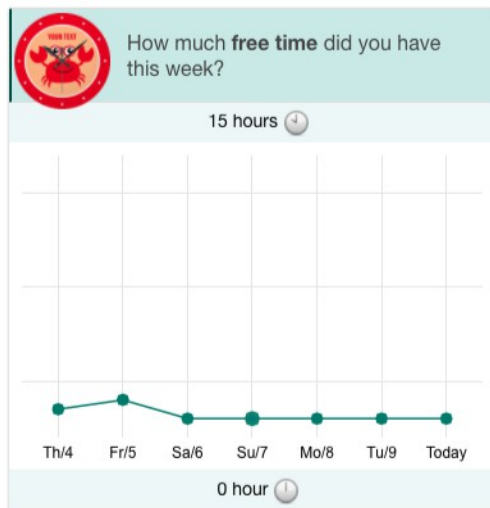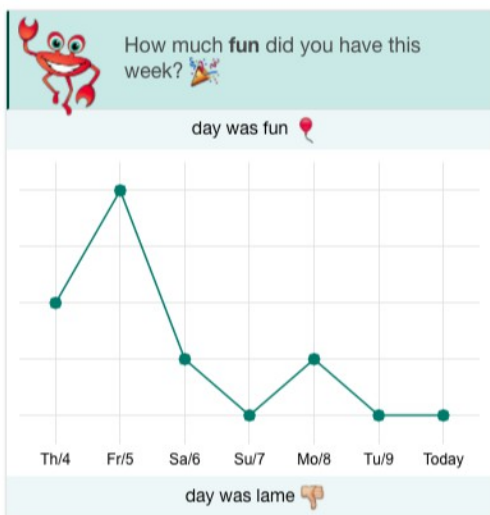

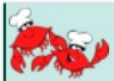

How **lonely** did you feel this week?

day was like 🧑

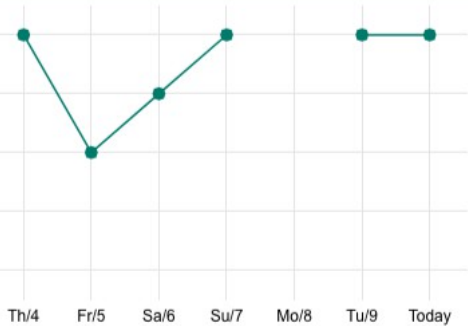

day was like 👫

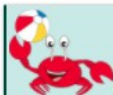

How **new** and **exciting** was your week?

day was like 🍷👯🌴

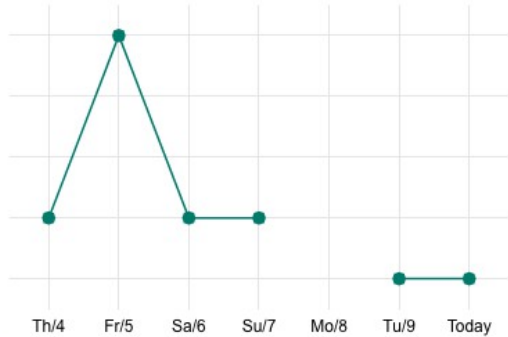

day was like 🛌

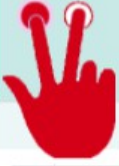

How quickly did you **tap** the buttons for 'tapping task'?

120 times 🐜

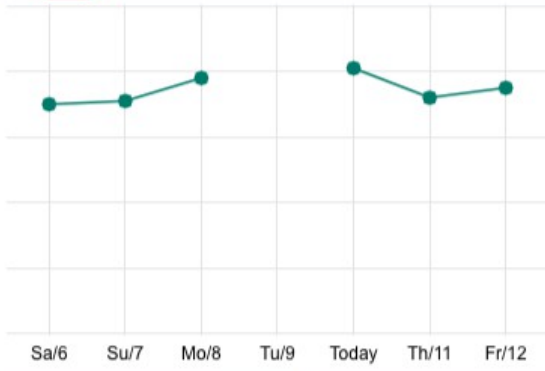

20 times 🐜

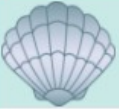

How quickly did you click the **right shells** for 'spatial task'?

10 seconds 🐜

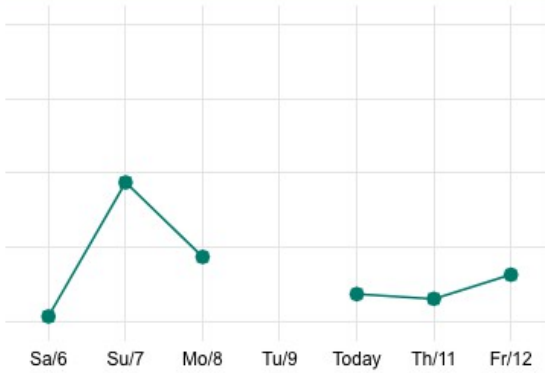

2 seconds 🐜
