# Supplementary material for: Toward Increasing Engagement in Substance Use Data Collection: Development of the Substance Abuse Research Assistant App and Protocol for a Microrandomized Trial Using Adolescents and Emerging Adults
Source: PubMed Central journal article supplement (PMC6070723; doi:10.2196/resprot.9850), 2018-07-18
Supplement: resprot_v7i7e166_app5.pdf [file resprot_v7i7e166_app5.pdf]

1. "Reach for the stars so if you fall you land on a cloud." - **Kanye West**
2. "No you're not perfect but you're not your mistakes." - **Kanye West**
3. "You have every right to a beautiful life." - **Selena Gomez**
4. "I'ma keep running 'cause a winner don't quit on themselves." - **Beyonce**
5. "The world will see you the way you see you, and treat you the way you treat yourself."  
- **Beyonce**
6. "If you have no shadows then you're not standing in the light." - **Lady Gaga**
7. "You have to be unique and different to shine in your own way." - **Lady Gaga**
8. "Who I wanna be still seems so far away but I know I'm gonna get there someday."  
- **Dierks Bentley**
9. "I put my armor on, show you how strong how I am. I put my armor on, I'll show you  
that I am unstoppable." - **Sia**
10. "I'm like a rubberband until you pull too hard. I may snap and I move fast but you won't  
see me fall apart." - **Sia**
11. "Just really, really believe in what you're trying to do. Don't let people alter that. Let  
people advise you and lead you down paths to make smart decisions." - **Luke Bryan**
12. "Build your own pyramids, write your own hieroglyph." - **Kendrick Lamar**
13. "We all get distracted, the question is, would you bounce back or bounce backwards?"  
- **Kendrick Lamar**
14. "I don't wanna be Jordan, I don't wanna be Bird or Isiah, I don't wanna be any of those  
guys. I want to look in the mirror and say I did it my way." - **Allen Iverson**
15. "I never worry about the problem. I worry about the solution." - **Shaquille O'Neal**
16. "I've had to learn to fight all my life - got to learn to keep smiling. If you smile things will  
work out." - **Serena Williams**
17. "Even though you're fed up, you gotta keep your head up." - **Tupac Shakur**
18. "Imma be what I set out to be, without a doubt undoubtedly." - **Eminem**
19. "The first step is you have to say that you can." - **Will Smith**
20. "The successful warrior is the average man, with laser-like focus." - **Bruce Lee**
21. "Sometimes it's the journey that teaches you a lot about your destination." - **Drake**
22. "Our greatest glory is not in falling but in rising every time we fall." - **Sylvester**

**Stallone**

23. "Being different from everyone else just made me a lot stronger." **-Drake**

24. "You know what they say. Fool me once, strike one, but fool me twice...strike three."

**-Michael Scott**

25. "Being happy is the goal, but greatness is my mission." **-Childish Gambino**

26. "The motivation for me was them telling me what I couldn't be." **-Jay Z**

27. "I'm hungry for knowledge. The whole thing is to learn every day. To get brighter and brighter. That's what this world is about." **-Jay Z**

28. "I seen a baby cry, seconds later he laughs. The beauty of life's pain, pain never lasts."

**-J. Cole**

29. "My mistakes are my biggest professors and learning life lessons." **-Big Sean**

30. "Dreams stopped being dreams when I turned 'em into goals." **-Big Sean**

31. "Cherish these nights, cherish these people. Life is a movie, but there'll never be a sequel." **-Nicki Minaj**

32. "Life is too short to live the same day twice. So each new day, make sure you live your life." **-Machine Gun Kelly**

33. "Why do we try so hard to fit in, when we were born to stand out?" **-Machine Gun**

**Kelly**

34. "Life without dreaming is a life without meaning." **-Wale**

35. "Let your dreams stay big and your worries stay small." **-Rascal Flatts**

36. "I hope you never look back but you never forget, all the ones who loved you and the place you left." **-Rascal Flatts**

37. "Don't believe in kings, believe in the Kingdom." **-Chance the Rapper**

38. "Everybody's somebody's everything." **-Chance the Rapper**
